# Supplementary material for: MinION-based long-read sequencing and assembly extends the Caenorhabditis elegans reference genome
Source: PubMed Central journal article supplement (PMC5793790; doi:10.1101/gr.221184.117), 2018-02

A

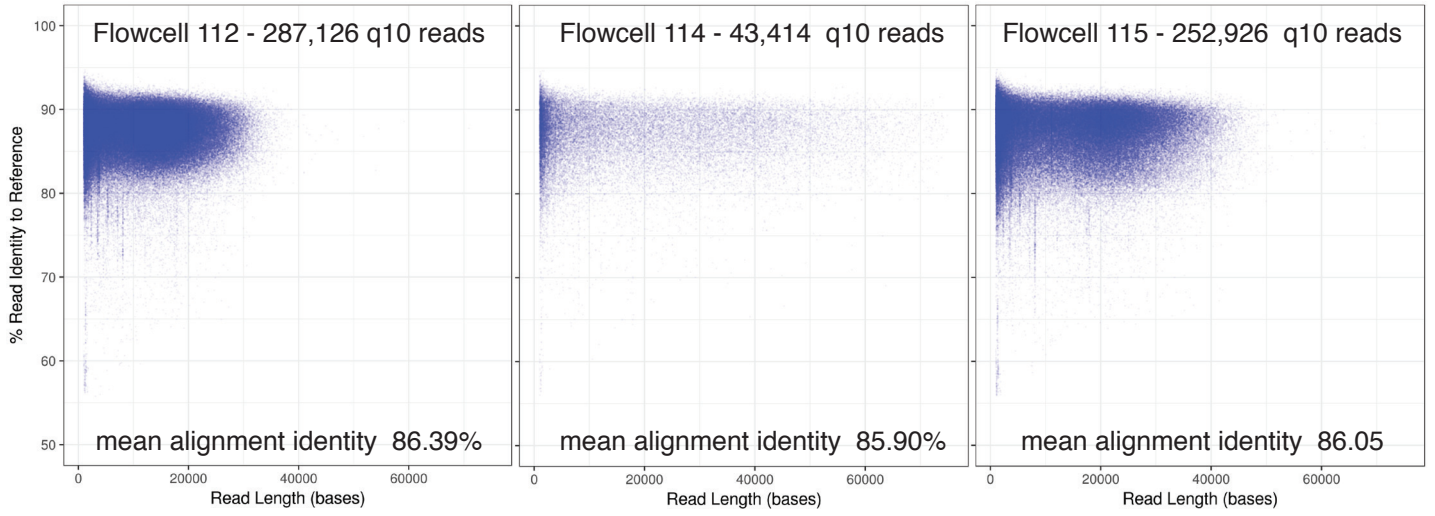

B

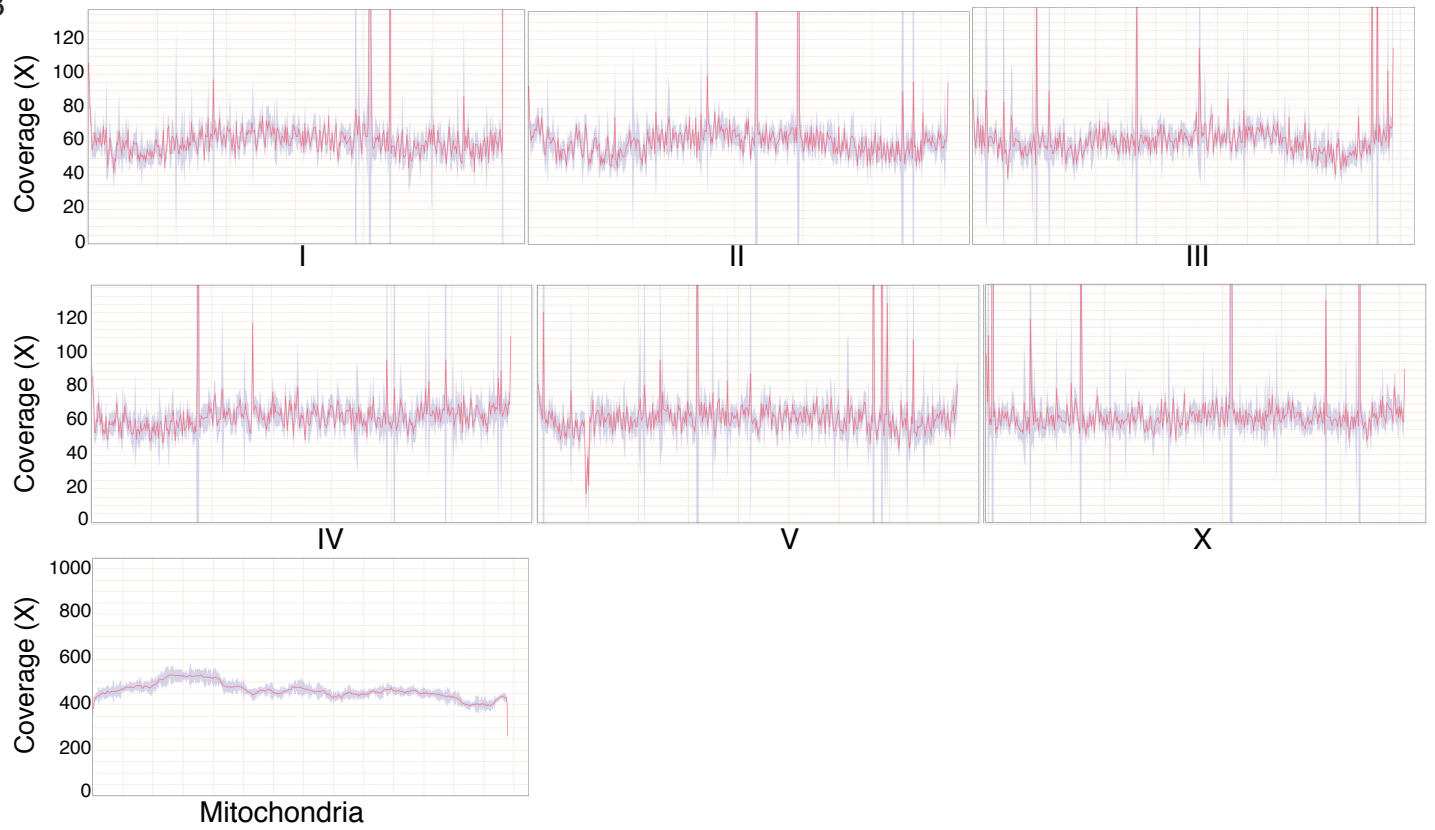

Supplement: supp_gr.221184.117_Supplemental_Fig_S1.pdf [file supp_gr.221184.117_Supplemental_Fig_S1.pdf]
