# Supplementary material for: MinION-based long-read sequencing and assembly extends the Caenorhabditis elegans reference genome
Source: Genome Res. 2018 Feb;28(2):266–74. doi: 10.1101/gr.221184.117 (PMC5793790; doi:10.1101/gr.221184.117)
Supplement: Supplemental Material [file supp_gr.221184.117_Supplemental_Table_S1.xlsx]

## Sheet: Sheet1
	VC2010 (Wild Type C. elegans)			him-9; ruIS32 C.elegans
	Flowcell112	Flowcell114	Flowcell115	Flowcell84	Flowcell85	Flowcell89	Flowcell90	Flowcell94	Flowcell95
Library Kit	SQK-LSK108	SQK-LSK108	SQK-LSK108	SQK-NSK007	SQK-NSK007	SQK-NSK007	SQK-NSK007	SQK-RAD001	SQK-RAD001
Flowcell ID	FAF17756	FAF18549	FAF18283	FAD11292	FAD11271	FAD11308	FAB23558	FAD24831	FAD24186
Pore Type	R9.4	R9.4	R9.4	R9.0	R9.0	R9.0	R9.0	R9.3	R9.3
DNA Shearing	29G needle 20X, 200ul	26G needle 20X, 200ul	29G needle 20X, 200ul	g-tube 2000g	g-tube 2000g	g-tube 2000g	g-tube 2000g	na	na
Start Materials	10,000ng	10,000ng	10,000ng	749ng	1650ng	1978ng	1978ng	864ng into 20ul	1152ng into 20ul
Volume Loaded	24ul 0hrs	12ul 0hrs	24ul 0hrs	12ul 0hrs, 12ul 0.5hrs	12ul 0hrs,	12ul 0hrs	6ul 0hrs, 6ul 24hrs	11ul 0hrs, 11ul 24hrs	11ul 0hrs, 11ul 24hrs
Preseq	158ng/ul	222ng/ul	104.80ng/ul	7.14ng/ul	5.34ng/ul	8.56ng/ul	8.56ng/ul	na	na
PlatQC Pores	818//449,279,86,4	758//431,253,72,2	918//469,336,111,2	1155//486,397,217,55	1036//467,357,170,42	1060//428,340,222,70	1404//489,444,330,141	1277//494,423,271,89	1361//504,448,312,97
Total Reads	541484	153653	421187	198913	184600	142374	155508	268004	161378
Pass Reads	na	na	na	36949	68204	34816	54892	180938	89376
Av Template Read Length	12489	8010	13040	831	4052	4486	4430	5001	4049
Av Complement Read Length	na	na	na	272	2281	2059	2125	na	na
Av 2D Read Length	na	na	na	171	2207	1826	1972	na	na
Top 25% Templates >	22453	47072	29782	904	6106	6858	6622	6390	4717
Total Called bases	6762705450	1230832063	5492310937	219411804	1169061304	931927653	1019278312	1340369063	653447905
Base Calling	Albacore 1.0.1	Albacore 1.0.1	Albacore 1.0.1	2D Chimera 1.22.10	2D Chimera 1.22.10	2D Chimera 1.22.10	2D Chimera 1.22.10	1D Chimera 1.22.10	1D Chimera 1.22.10
MinKNOW version	1.4.1	1.5.5	1.5.5	0.51.3.55	0.51.3.55	0.51.3.55	0.51.3.55	1.0.5	1.0.5
