# Supplementary material for: MinION-based long-read sequencing and assembly extends the Caenorhabditis elegans reference genome
Source: Genome Res. 2018 Feb;28(2):266–74. doi: 10.1101/gr.221184.117 (PMC5793790; doi:10.1101/gr.221184.117)
Supplement: Supplemental Material [file supp_gr.221184.117_Supplemental_Table_S2.xlsx]

## Sheet: All_Chips_q10_1-0-1_serge_C (2
Supplemental Table 2a. VC2010 All Chip Assembly
Output from Mummer 'show-tiling' command of unique mapping contigs only (show-tiling -g -1 -v 1 assembly.delta > assembly.tiling)
Reference Sequence	Start in Ref	End in Ref	Gaps to Next	Length of Contig	Aln Coverage	Identity of Aln	Orientation	Contig ID
NC_003279.8 15072434 bases	909	893491	-11411	892583	99.55	99.35	+	tig00000109
	882081	933336	-5429	51256	100	99.32	-	tig00000147
	927908	4342044	-84351	3414137	98.49	99.53	-	tig00000302
	4257694	4546798	-14649	289105	91.21	99.2	+	tig00000300
	4532150	11120607	-222040	6588458	98.29	99.55	-	tig00000006
	10898568	14014562	-9225	3115995	98.97	98.45	-	tig00000027
	14005338	14113277	-3820	107940	100	99.81	-	tig00000137
	14109458	15048238	-38104	938781	99.73	99.53	+	tig00000105
	15010135	15109113	-36679	98979	12.86	99.09	+	tig00000197
NC_003280.10 15279421 bases	-9431	2971913	-152933	2981345	99.34	99.05	-	tig00000046
	2818981	12906116	-59959	10087136	98.56	99.56	+	tig00000001
	12846158	14021998	-42017	1175841	98.6	98.63	-	tig00000093
	13979982	14345168	-6244	365187	98.34	99.26	-	tig00000124
	14338925	15290218	-10797	951294	99.4	99.72	+	tig00000107
NC_003281.10 13783801 bases	-22634	937517	-11173	960152	98.49	99.47	-	tig00000099
	926345	1041154	-23819	114810	86.23	97.61	+	tig00000083
	1017336	1313786	-13165	296451	97.56	99.1	+	tig00000123
	1300622	2532560	-37514	1231939	97.2	99.6	+	tig00000096
	2495047	3333988	1103	838942	99.69	99.74	-	tig00000111
	3335092	6802586	-232067	3467495	58.73	99.8	-	tig00000031
	6570520	7405723	-46578	835204	99.95	99.88	+	tig00000103
	7359146	11653615	-64993	4294470	97.46	99.45	-	tig00000298
	11588623	13830680	-46879	2242058	98.54	98.92	-	tig00000052
NC_003282.8 17493829 bases	1782	2816531	8081	2814750	99.22	99.59	+	tig00000050
	2824613	3209038	-23080	384426	91.39	99.21	+	tig00000118
	3185959	8675848	-109812	5489890	99.15	99.38	+	tig00000015
	8566037	9053794	-15780	487758	98.94	99	+	tig00000115
	9038015	10954981	-4378	1916967	99.37	99.78	+	tig00000084
	10950604	11097618	-67551	147015	59.55	99.48	+	tig00000306
	11030068	13394108	-85520	2364041	98.71	99.48	-	tig00000058
	13308589	15090485	-64155	1781897	97.88	99.51	+	tig00000075
	15026331	17492335	1494	2466005	99.23	99.3	-	tig00000061
NC_003283.11 20924180 bases	-91955	5301603	-1106744	5393559	79.32	99.55	-	tig00000013
	4194860	10736420	-156959	6541561	98.19	98.85	+	tig00000008
	10579462	13644877	1030716	3065416	99.02	99.91	-	tig00000041
	14675594	14771695	-29858	96102	83.91	99.14	-	tig00000091
	14741838	16710738	-118128	1968901	98.94	99.85	+	tig00000070
	16592611	18941685	-57696	2349075	96.09	99.02	+	tig00000054
	18883990	18980079	2262	96090	99.4	99.44	-	tig00000139
	18982342	19333372	-4680	351031	99.89	99.24	-	tig00000121
	19328693	20910637	13543	1581945	99.23	99.63	-	tig00000086
NC_003284.9 17718942 bases	-9556	131516	-17511	141073	86.89	96.36	+	tig00000141
	114006	328055	-85907	214050	70.96	98.24	+	tig00000303
	242149	1648423	-6009	1406275	96.25	99.68	+	tig00000305
	1642415	1745463	-3876	103049	98.52	99.89	+	tig00000143
	1741588	2040620	-53386	299033	92.91	97.43	+	tig00000128
	1987235	4085677	-49000	2098443	99.35	99.15	+	tig00000043
	4036678	5071981	-16871	1035304	98.49	99.59	+	tig00000101
	5055111	7079862	-43662	2024752	99.94	99.85	+	tig00000067
	7036201	10369828	1391292	3333628	99.24	99.57	+	tig00000032
	11761121	11887056	-12315	125936	97.62	96.14	-	tig00000133
	11874742	14932776	-44974	3058035	99.18	99.63	-	tig00000037
	14887803	17734346	-15404	2846544	99.5	99.69	-	tig00000048

## Sheet: Chips_114_115_q10_serge_wor (2
Supplemental Table 2b. VC20 Chip114_115 Assembly
Output from Mummer 'show-tiling' command of unique mapping contigs only (show-tiling -g -1 -v 1 assembly.delta > assembly.tiling)
Reference Sequence	Start in Ref	End in Ref	Gaps to Next	Length of Contig	Aln Coverage	Identity of Aln	Orientation	Contig ID
>NC_003279.8 15072434 bases	610	944521	-15672	943912	99.56	99.33	+	tig00000099
	928850	4342546	172352	3413697	98.52	99.65	-	tig00000053
	4514899	10290306	-276126	5775408	98.39	99.73	-	tig00000485
	10014181	15075686	-3252	5061506	98.38	96.83	-	tig00000483
>NC_003280.10 15279421 bases	164	4760045	-141974	4759882	98.89	98.96	+	tig00000486
	4618072	5152068	-33848	533997	99.02	98.99	+	tig00000488
	5118221	8336218	-145116	3217998	98.35	99.63	+	tig00000065
	8191103	12854461	-8388	4663359	99.32	99.4	-	tig00000034
	12846074	14031826	-48929	1185753	98.97	98.78	+	tig00000103
	13982898	14345486	-6420	362589	98.08	99.46	+	tig00000125
	14339067	15293416	-13995	954350	99.25	99.74	-	tig00000114
>NC_003281.10 13783801 bases	-22383	932483	-1122	954867	98.12	99.72	+	tig00000111
	931362	1040928	-45778	109567	91.55	97.81	+	tig00000048
	995151	1315466	-27454	320316	91.24	98.74	+	tig00000059
	1288013	2535235	-53856	1247223	97.28	99.31	+	tig00000108
	2481380	3334089	897	852710	99.38	99.23	+	tig00000116
	3334987	7444179	-423393	4109193	99.82	99.53	-	tig00000051
	7020787	13875108	-91307	6854322	94.26	99.25	+	tig00000015
>NC_003282.8 17493829 bases	613	2837257	-7078	2836645	99.36	99.65	+	tig00000068
	2830180	3207467	-23660	377288	91.39	99.74	+	tig00000123
	3183808	8694873	-147209	5511066	99.35	98.98	+	tig00000026
	8547665	9051992	-5396	504328	99.35	95.75	-	tig00000121
	9046597	10976316	-10562	1929720	99.08	99.74	+	tig00000091
	10965755	11121991	-139085	156237	55.77	99.74	+	tig00000137
	10982907	13363364	-49521	2380458	98.09	99.55	-	tig00000074
	13313844	15067795	-37472	1753952	98.69	99.55	+	tig00000089
	15030324	17492722	1107	2462399	99.2	99.29	+	tig00000078
>NC_003283.11 20924180 bases	-153074	8020162	-142066	8173237	97.75	99.15	+	tig00000480
	7878097	14831003	-88508	6952907	98.34	99.76	+	tig00000482
	14742496	16712905	-18081	1970410	98.82	99.85	+	tig00000087
	16694825	17146345	-211459	451521	95.88	98.97	-	tig00000491
	16934887	20923316	864	3988430	97.71	99.2	-	tig00000489
>NC_003284.9 17718942 bases	-9325	109891	3583	119217	91.79	99.34	+	tig00000144
	113475	289431	-59267	175957	80.15	99.02	+	tig00000134
	230165	1765811	-10901	1535647	95.33	99.75	-	tig00000093
	1754911	2037264	-71033	282354	90.42	99.3	+	tig00000132
	1966232	4094986	-47532	2128755	98.16	99.14	+	tig00000017
	4047455	5072121	-16712	1024667	98.74	99.7	-	tig00000106
	5055410	7078173	-46527	2022764	99.95	99.86	+	tig00000084
	7031647	10361347	5691	3329701	99.33	99.52	-	tig00000063
	10367039	11819546	-81186	1452508	99.42	99.09	-	tig00000100
	11738361	11887080	-10254	148720	98.66	94.96	-	tig00000036
	11876827	14937124	-41910	3060298	99.27	99.62	-	tig00000066
	14895215	17734331	-15389	2839117	99.62	99.75	-	tig00000072

## Sheet: him-9_serge_all_Chips_Pass_ (2
Supplemental Table 2c. him-9;ruIs32 All pass read Assembly
Output from Mummer 'show-tiling' command of unique mapping contigs only (show-tiling -g -1 -v 1 assembly.delta > assembly.tiling)
Reference Sequence	Start in Ref	End in Ref	Gaps to Next	Length of Contig	Aln Coverage	Identity of Aln	Orientation	Contig ID
NC_001328.1 13794 bases	-9479	17905	-4111	27385	50.72	99.34	+	tig00000101
NC_003279.8 15072434 bases	1595	669320	1422	667726	99.89	99.76	-	tig00000135
	670743	933501	756	262759	99.72	99.55	-	tig00000149
	934258	1126177	-7054	191920	97.71	99.14	-	tig00001932
	1119124	2393738	-42431	1274615	96.5	99.44	-	tig00001931
	2351308	4587613	-76024	2236306	97.76	99.36	+	tig00000002
	4511590	10251805	-76575	5740216	98.77	99.63	-	tig00000009
	10175231	10973824	-6680	798594	96.53	96.86	-	tig00001908
	10967145	11656408	-3130	689264	99.33	99.49	-	tig00000138
	11653279	12092670	-6508	439392	99.84	99.54	+	tig00000147
	12086163	13487018	-765	1400856	98.67	99.63	-	tig00000110
	13486254	13896585	-13344	410332	98.97	99.41	-	tig00000145
	13883242	15068227	4207	1184986	99.47	99.5	-	tig00000106
NC_003280.10 15279421 bases	642	990962	-14774	990321	99.61	99.62	-	tig00000116
	976189	3331346	-10622	2355158	98.95	99.14	-	tig00000080
	3320725	3466160	-1248	145436	97.2	99.76	-	tig00000152
	3464913	3589060	-36581	124148	99.78	99.03	+	tig00000165
	3552480	4653558	-47663	1101079	98.27	98.97	-	tig00001930
	4605896	5151627	-9156	545732	96.47	99.13	-	tig00001928
	5142472	6518558	-20320	1376087	99.68	99.6	+	tig00001922
	6498239	7887605	-3232	1389367	99.26	99.9	+	tig00001924
	7884374	9428223	-30536	1543850	99.42	99.8	-	tig00000028
	9397688	10354628	-287593	956941	98.38	99.49	-	tig00001869
	10067036	12886999	-41076	2819964	89.24	99.68	-	tig00000017
	12845924	14019458	-39439	1173535	98.7	98.94	-	tig00000063
	13980020	14349276	-9919	369257	97.44	99.15	-	tig00000090
	14339358	15290173	-10752	950816	98.76	99.68	-	tig00000123
NC_003281.10 13783801 bases	131	335130	-16427	335000	99.62	99.24	+	tig00000141
	318704	933465	43202	614762	98.8	99.7	+	tig00000069
	976668	1039094	-13134	62427	60.32	96.11	+	tig00001946
	1025961	1308504	-15797	282544	98.99	99.5	+	tig00001921
	1292708	2535511	-37459	1242804	97.25	99.58	-	tig00001894
	2498053	4257587	-8572	1759535	99.69	99.77	-	tig00001888
	4249016	5360628	-26668	1111613	99.94	99.82	-	tig00001887
	5333961	7406472	-17899	2072512	99.51	99.72	-	tig00001885
	7388574	8104942	-1077	716369	98.58	98.7	+	tig00000053
	8103866	9432543	-13642	1328678	99.59	99.65	-	tig00000104
	9418902	10098757	111933	679856	99.99	99.88	+	tig00000113
	10210691	10239901	-23519	29211	57.91	96.36	+	tig00001883
	10216383	10642373	-274571	425991	91.1	99.75	+	tig00001884
	10367803	12477642	-605	2109840	88.92	99.46	-	tig00000079
	12477038	13805862	-22061	1328825	99.11	98.71	+	tig00000098
NC_003282.8 17493829 bases	13553	1612186	-549	1598634	99.3	99.75	+	tig00000082
	1611638	2839116	-23728	1227479	98.76	99.38	+	tig00000093
	2815389	4417513	-9618	1602125	97.81	99.21	+	tig00000056
	4407896	6364380	-24653	1956485	99.47	99.83	+	tig00001880
	6339728	6676806	6435	337079	99.04	99.08	-	tig00001898
	6683242	6727789	-151	44548	85.08	91.22	+	tig00001897
	6727639	7370524	-10825	642886	99.95	99.83	+	tig00001935
	7359700	8599922	-19304	1240223	98.82	98.58	+	tig00001909
	8580619	9051011	-1585	470393	99.58	99.74	+	tig00001911
	9049427	10359420	-12814	1309994	99.3	99.87	-	tig00000108
	10346607	10946349	-2372	599743	98.98	99.98	-	tig00000132
	10943978	10991932	-23510	47955	84.51	99.49	-	tig00000256
	10968423	11071654	-10153	103232	84.62	99.33	-	tig00000044
	11061502	13403943	-73611	2342442	98.5	99.65	+	tig00001875
	13330333	15079793	152	1749461	99.19	99.55	+	tig00001877
	15079946	15193562	-6041	113617	99.3	98.47	-	tig00000071
	15187522	17547826	-53997	2360305	97.53	99.68	+	tig00000012
NC_003283.11 20924180 bases	-42968	1106747	203505	1149716	95.44	99.85	+	tig00000119
	1310253	4334859	-1611	3024607	99.08	99.64	-	tig00000043
	4333249	5338410	-142561	1005162	99.27	98.45	+	tig00001871
	5195850	10661114	-52377	5465265	98.4	99.27	+	tig00001873
	10608738	11391856	-3125	783119	99.37	99.91	+	tig00000124
	11388732	12512907	-2659	1124176	99.74	99.96	+	tig00000117
	12510249	14791776	-29349	2281528	98.67	99.82	+	tig00000072
	14762428	16733876	-30742	1971449	98.97	99.63	+	tig00001912
	16703135	17115720	-15989	412586	98.86	99.72	+	tig00001914
	17099732	17147471	-17491	47740	28.89	95.42	-	tig00000067
	17129981	17443886	-55720	313906	95.32	95.85	+	tig00001916
	17388167	18235867	-28315	847701	98.89	99.54	+	tig00001918
	18207553	18719519	-25579	511967	98.4	98.97	-	tig00001927
	18693941	19970749	-3943	1276809	98.63	99.28	-	tig00001925
	19966807	20923163	1017	956357	99.88	99.78	+	tig00000121
NC_003284.9 17718942 bases	-3506	105118	178583	108625	90.08	99.09	+	tig00000220
	283702	1775057	-20491	1491356	98.68	99.71	+	tig00001901
	1754567	1887839	-76047	133273	99.83	99.28	-	tig00000015
	1811793	4054765	-10260	2242973	96.98	99.51	-	tig00001882
	4044506	5059073	-5636	1014568	99.57	99.75	-	tig00000018
	5053438	7089940	-21645	2036503	99.83	99.56	+	tig00001903
	7068296	9199367	240802	2131072	99.76	99.66	+	tig00001905
	9440170	10368045	-11204	927876	99.75	99.77	+	tig00000046
	10356842	11789347	-6646	1432506	99.42	99.8	+	tig00000036
	11782702	11900342	-24947	117641	97.51	98.17	+	tig00000042
	11875396	14934393	-38477	3058998	99.14	99.58	+	tig00001891
	14895917	17734658	-15716	2838742	99.53	99.73	+	tig00000054
