# Supplementary material for: MinION-based long-read sequencing and assembly extends the Caenorhabditis elegans reference genome
Source: Genome Res. 2018 Feb;28(2):266–74. doi: 10.1101/gr.221184.117 (PMC5793790; doi:10.1101/gr.221184.117)
Supplement: Supplemental Material [file supp_gr.221184.117_Supplemental_Table_S4.xlsx]

## Sheet: Paper
		VC2010 Wild-type C. elegans Genome Assemblies
		All_flowcells_q10	All_flowcells_q10	All_flowcells_q10	All_flowcells_q10	All_flowcells_q10	flowcells_114_115	flowcells_114_115
	Pilon polish	na	1x	2x	3x	4x	na	4x
	Basecaller	Albacore 1.0.1	Albacore 1.0.1	Albacore 1.0.1	Albacore 1.0.1	Albacore 1.0.1	Albacore 1.0.1	Albacore 1.0.1
	TotalSeqs	73	73	73	73	73	62	62
Sequences	AlignedSeqs	56 (76.71%)	56 (76.71%)	56 (76.71%)	56 (76.71%)	56 (76.71%)	48 (77.42%)	48 (77.42%)
	UnalignedSeqs	17 (23.29%)	17 (23.29%)	17 (23.29%)	17 (23.29%)	17 (23.29%)	14 (22.58%)	14 (22.58%)
	TotalBases	111163168	112479700	112467488	112470243	112455926	111570919	112656181
Bases	AlignedBases	101,193,194 (91.03%)	102,488,969 (91.12%)	102,487,312 (91.13%)	102,489,961 (91.13%)	102,476,392 (91.13%)	101,863,799 (91.30%)	102,904,123 (91.34%)
	UnalignedBases	9,969,974 (8.97%)	9,990,731 (8.88%)	9,980,176 (8.87%)	9,980,282 (8.87%)	9,979,534 (8.87%)	9,707,120 (8.70%)	9,752,058 (8.66%)
	1-to-1	1463	1541	1685	1743	1750	1357	1635
	TotalLength	99292964	102284871	107064584	108242372	108300674	99373083	108240987
	AvgLength	67869.4	66375.6	63539.8	62101.2	61886.1	73230	66202.4
Alignments	AvgIdentity	98.48	99.77	99.82	99.83	99.83	98.59	99.84
	M-to-M	9584	9811	9944	10090	10015	10430	10846
	TotalLength	104199243	107225696	112304335	113674178	113761190	105351448	113944243
	AvgLength	10872.2	10929.1	11293.7	11266	11359.1	10100.8	10505.6
	AvgIdentity	98.25	99.5	99.57	99.58	99.58	98.35	99.58
	TotalSNPs	48169	37379	22728	21232	22857	79281	23887
	TotalGSNPs	9497	17752	2160	2092	2155	21915	2332
SNPs	TotalIndels	1394760	131481	98805	90097	91085	1257225	79809
	TotalGIndels	580884	16793	7887	5599	5557	560520	5658
		VC2010 Wild-type C. elegans Genome Assemblies						him-9 C. elegans Genome Assemblies
		Flowcell-112_q10	Flowcell-114_q10	Flowcell-115_q6	Flowcell-115_q6	Flowcell-115_q10	Flowcell-115_q10	him-9_all_pass	him-9_all_pass
	Pilon polish	na	na	na	4x	na	4x	na	4x
	Basecaller	Albacore 1.0.1	Albacore 1.0.1	Albacore 0.8.4	Albacore 0.8.4	Albacore 1.0.1	Albacore 1.0.1	Metrichor	Metrichor
	TotalSeqs	106	423	87	87	79	79	235	235
Sequences	AlignedSeqs	97 (91.51%)	421 (99.53%)	73 (83.91%)	73 (83.91%)	71 (89.87%)	71 (89.87%)	100 (42.55%)	100 (42.55%)
	UnalignedSeqs	9 (8.49%)	2 (0.47%)	14 (16.09%)	14 (16.09%)	8 (10.13%)	8 (10.13%)	135 (57.45%)	135 (57.45%)
	TotalBases	110085324	64544457	107769619	111762590	110536436	112000364	103327579	105960742
Bases	AlignedBases	100,831,257 (91.59%)	56,146,099 (86.99%)	98,157,472 (91.08%)	102,148,542 (91.40%)	101,309,082 (91.65%)	102,762,296 (91.75%)	99,695,641 (96.49%)	102308633 (96.55%)
	UnalignedBases	9,254,067 (8.41%)	8,398,358 (13.01%)	9,612,147 (8.92%)	9,614,048 (8.60%)	9,227,354 (8.35%)	9,238,068 (8.25%)	3,631,938 (3.51%)	3,652,109 (3.45%)
	1-to-1	1433	1293	2174	2198	1547	1759	1467	1846
	TotalLength	99317819	55604749	96412432	107348823	98850870	108007972	98144527	108512401
	AvgLength	69307.6	43004.4	44347.9	48839.3	63898.4	61403.1	66901.5	58782.4
Alignments	AvgIdentity	98.23	95.88	95.81	99.74	98.25	99.82	97.21	99.8
	M-to-M	8876	20900	10793	11272	9771	10316	9754	10305
	TotalLength	103825961	63020314	101655408	113106696	104809654	113593240	102846247	113816708
	AvgLength	11697.4	3015.33	9418.64	10034.3	10726.6	11011.4	10544	11044.8
	AvgIdentity	98.04	95.29	95.6	99.42	98.04	99.56	97.02	99.56
	TotalSNPs	85413	355523	49483	23416	73306	22694	44714	26000
	TotalGSNPs	18218	25475	4735	2138	16051	2088	5861	2678
SNPs	TotalIndels	1613116	1949155	4006206	170759	1587752	101573	2652479	116667
	TotalGIndels	611401	342159	643566	6253	604842	6439	612692	5663
Supplemental Table S2: Mummer report extracted stats of different assemblies compared to the C. elegans wild type reference sequence GCF_000002985.6_WBcel235. Reference sequence length = 100,286,401 bases. Albacore 0.8.4 (Non-homopolymer basecalling), Albacore 1.0.1 (Homopolymer basecalling) software (Oxford Nanopore Technologies).
